# Supplementary material for: Polymethine Dye-Functionalized Nanoparticles for Targeting CML Stem Cells
Source: PubMed Central journal article supplement (PMC7452122; doi:10.1016/j.omto.2020.07.007), 2020-07-25
Supplement: mmc1.pdf [file mmc1.pdf]

**OMTO, Volume 18**

## **Supplemental Information**

### **Polymethine Dye-Functionalized Nanoparticles**

#### **for Targeting CML Stem Cells**

**Philipp Ernst, Adrian T. Press, Mike Fischer, Vivien Günther, Christine Gräfe, Joachim H. Clement, Thomas Ernst, Ulrich S. Schubert, Jana Wotschadlo, Marc Lehmann, Christoph Enzensperger, Michael Bauer, and Andreas Hochhaus**

## Supplemental Data

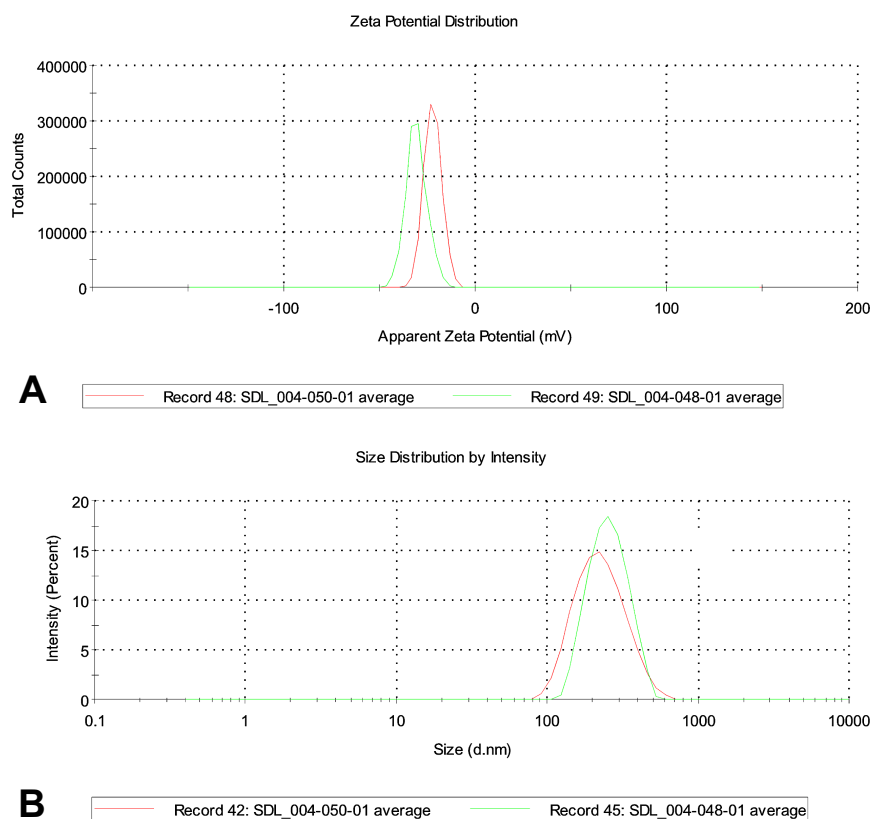

**Figure S1. Zeta potential and size distribution of nanoparticle suspensions SDL-004-050-01 and SDL-004-048-01.** (A) The graph shows surface charge of SDL\_004-050-01 (red line; -22 mV) and SDL\_004-048-01 (green line; -31 mV). The average results from three individual values from zeta potential measurements with a Zetasizer Nano ZS. (B) The graph shows the size distribution of SDL\_004-050-01 (red line; 207 nm) and SDL\_004-048-01 (green line; 241 nm) by intensity. Both nanoparticle suspension has a narrow size distribution and no aggregates. The average results from five individual measurements by dynamic light scattering with a Zetasizer Nano ZS. SDL\_004-050-01 = DY-635[NP](NileRed). SDL\_004-048-01 = [NP](NileRed).

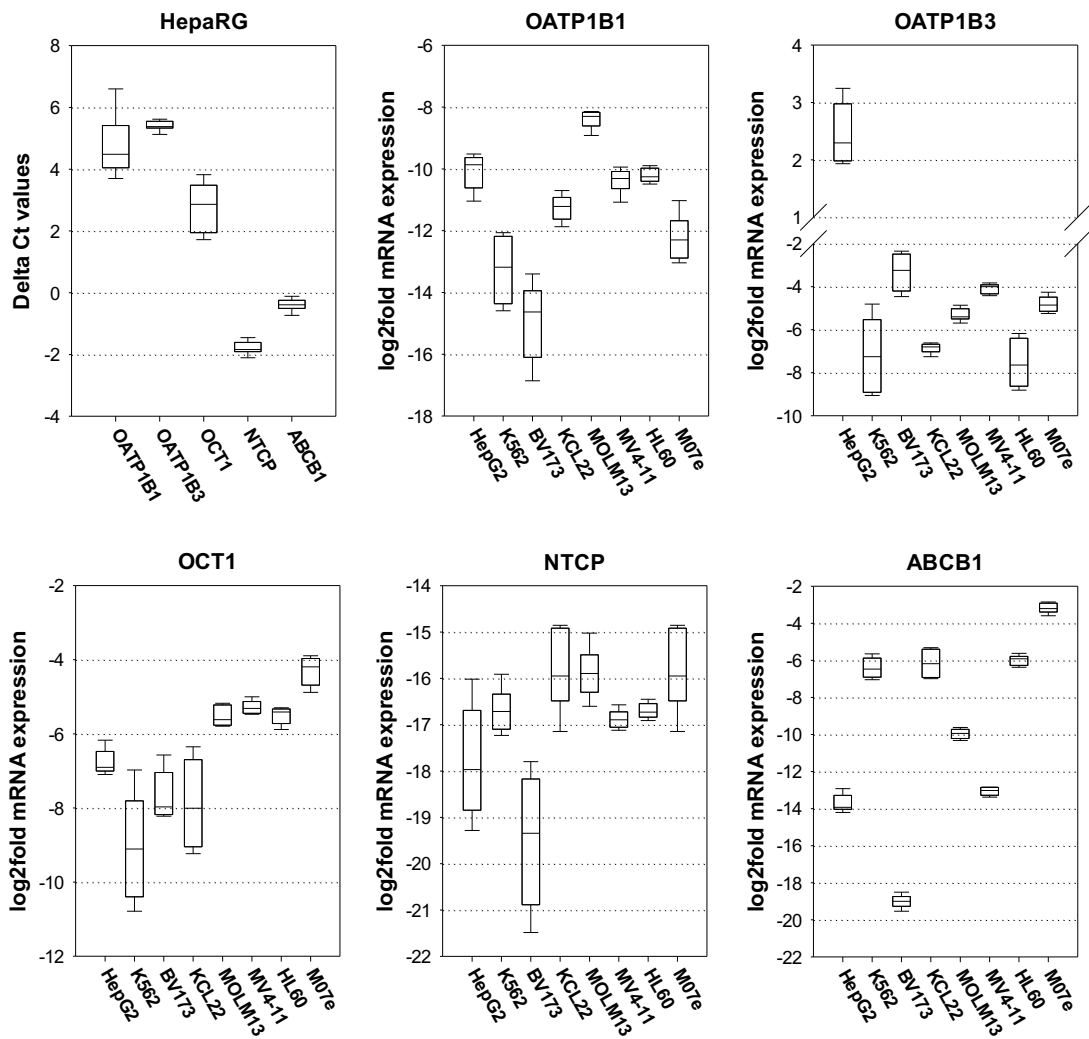

**Figure S2. Quantitative Real-Time PCR measurements of mRNA expression of carrier proteins in different cell lines.** Calculation of log<sub>2</sub>fold mRNA expression of carrier proteins was carried out with reference to the delta Ct values of the mRNA of the carrier proteins of the HepaRG cells. Delta Ct values refer to β-glucuronidase (β-GUS). Box plots with median and standard deviation are shown.

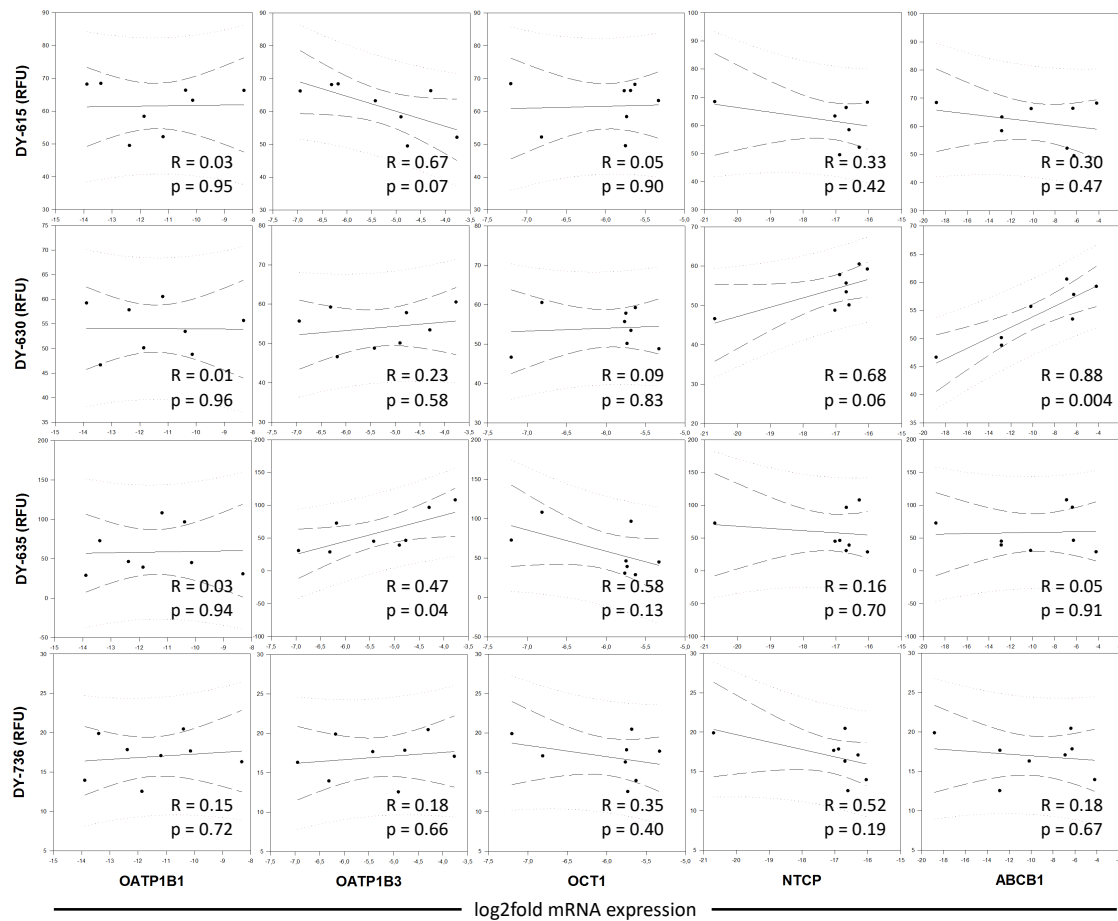

**Figure S3. Correlation between dye uptake and mRNA expression of carrier proteins in leukemia cell lines.**

Pearson correlation of the RFU of leukemia cell lines after incubation with in each case 100 nM DY-615, DY-630, DY-635, and DY-736 with the log2-fold mRNA expression of carrier proteins OATP1B1, OATP1B3, OCT1, NTCP, and ABCB1 of the respective cell line. N = 8. R = Correlation coefficient. p = Probability of error.

## Supplemental Materials

**Table S1.** Chronic myelogenous leukemia patients investigated

| <b>Patient</b> | <b>Material</b> | <b>Age (years)</b> | <b>BCR-ABL1 transcript type</b> | <b>Sex</b> | <b>Patient</b> | <b>Material</b> | <b>Age (years)</b> | <b>BCR-ABL1 transcript type</b> | <b>Sex</b> |
|----------------|-----------------|--------------------|---------------------------------|------------|----------------|-----------------|--------------------|---------------------------------|------------|
| #1             | PB              | 53                 | b2a2                            | m          | #16            | PB              | 49                 | b3a2                            | f          |
| #2             | PB              | 49                 | b3a2                            | f          | #17            | PB              | 32                 | b3a2                            | m          |
| #3             | PB              | 56                 | b2a2                            | m          | #18            | PB              | 51                 | b2a2/<br>b3a2                   | f          |
| #4             | PB              | 64                 | b3a2                            | m          | #19            | PB              | 74                 | b2a2                            | m          |
| #5             | PB              | 65                 | b2a2                            | f          | #20            | PB              | 31                 | b2a2                            | m          |
| #6             | PB              | 68                 | b3a2                            | m          | #21            | PB              | 75                 | b3a2                            | f          |
| #7             | PB              | 66                 | b3a2                            | m          | #22            | PB/ BM          | 55                 | b2a2                            | m          |
| #8             | PB              | 70                 | b3a2                            | f          | #23            | PB/ BM          | 72                 | b2a2                            | m          |
| #9             | PB              | 59                 | b2a2                            | m          | #24            | PB/ BM          | 58                 | b2a2                            | m          |
| #10            | PB              | 43                 | b3a2                            | m          | #25            | PB              | 30                 | b2a2/<br>b3a2                   | m          |
| #11            | PB              | 68                 | b3a2                            | f          | #26            | PB              | 59                 | b2a2                            | m          |
| #12            | PB              | 59                 | b3a2                            | m          | #27            | PB              | 50                 | b2a2                            | f          |
| #13            | PB              | 62                 | b3a2                            | m          | #28            | PB              | 52                 | b3a2                            | m          |
| #14            | PB              | 21                 | b3a2                            | f          | #29            | PB/ BM          | 19                 | b3a2                            | m          |
| #15            | PB/ BM          | 42                 | b3a2                            | f          | #30            | PB              | 52                 | b2a2/<br>b3a2                   | m          |

PB – Peripheral blood, BM – Bone marrow, m – male, f – female

**Table S2.** Structural formula, molecular weight and wavelength of Polymethine dyes and Nile Red

| Dye          | Structural formula                                                                  | Molecular weight                             | Wavelength                                                                        | Company                                 |
|--------------|-------------------------------------------------------------------------------------|----------------------------------------------|-----------------------------------------------------------------------------------|-----------------------------------------|
| DY-635-amine | 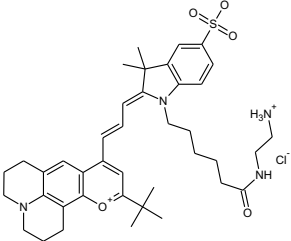   | 737.39 g mol <sup>-1</sup><br>(as HCl salt)  | $\lambda_{\text{abs}} = 658 \text{ nm}$<br>$\lambda_{\text{em}} = 695 \text{ nm}$ | Dyomics GmbH,<br>Jena, Germany          |
| DY-630-amine |    | 713.37 g mol <sup>-1</sup><br>(as HCl salt)  | $\lambda_{\text{abs}} = 636 \text{ nm}$<br>$\lambda_{\text{em}} = 657 \text{ nm}$ | Dyomics GmbH,<br>Jena, Germany          |
| DY-615-amine |   | 657.26 g mol <sup>-1</sup><br>(as HCl salt)  | $\lambda_{\text{abs}} = 621 \text{ nm}$<br>$\lambda_{\text{em}} = 641 \text{ nm}$ | Dyomics GmbH,<br>Jena, Germany          |
| DY-736-amine |  | 807.03 g mol <sup>-1</sup><br>(zwitterionic) | $\lambda_{\text{abs}} = 736 \text{ nm}$<br>$\lambda_{\text{em}} = 759 \text{ nm}$ | Dyomics GmbH,<br>Jena, Germany          |
| Nile Red     |  | 318.37 g mol <sup>-1</sup><br>(as HCl salt)  | $\lambda_{\text{abs}} = 552 \text{ nm}$<br>$\lambda_{\text{em}} = 638 \text{ nm}$ | Sigma Aldrich,<br>Darmstadt,<br>Germany |

**Table S3.** Hydrodynamic diameter (size), zeta potential and polydispersity index (PDI) of nanoparticle suspensions SDL-004-050-01 and SDL-004-048-01. *Poly(lactic-co-glycolic acid)* (PLGA), Nile red (NR)

| Sample         | Description      | Size [nm] |         | PDI   |         | Zeta potential [mV] |         |
|----------------|------------------|-----------|---------|-------|---------|---------------------|---------|
|                |                  |           | SD      |       | SD      |                     | SD      |
| SDL-004-050-01 | PLGA-DY-365 + NR | 207       | ± 1.718 | 0.119 | ± 0.038 | -22                 | ± 0.208 |
| SDL-004-048-01 | PLGA + NR        | 241       | ± 3.070 | 0.077 | ± 0.015 | -31                 | ± 0.586 |

**Table S4.** Concentration of Nile red (NR) and DY-635 of nanoparticle suspensions SDL-004-050-01 and SDL-004-048-01.

| Sample         | NR concentration [ $\mu\text{g mL}^{-1}$ ] per 1 mg $\text{mL}^{-1}$ nanoparticle concentration | DY-635 concentration [ $\mu\text{g mL}^{-1}$ ] per 1 mg $\text{mL}^{-1}$ nanoparticle concentration |
|----------------|-------------------------------------------------------------------------------------------------|-----------------------------------------------------------------------------------------------------|
| SDL-004-050-01 | 0.730                                                                                           | 0.649                                                                                               |
| SDL-004-048-01 | 0.489                                                                                           | 0                                                                                                   |

**Table S5.** Antibodies and reagents for flow cytometry

| Conjugates              | Source | Specificity | Concentration                            | Company                             |
|-------------------------|--------|-------------|------------------------------------------|-------------------------------------|
| Annexin V-APC           |        |             | 0.8 $\mu\text{L}$ 100 $\mu\text{L}^{-1}$ | ImmunoTools, Friesoythe, Germany    |
| Propidiumiodid          |        |             | 0.4 $\mu\text{L}$ 100 $\mu\text{L}^{-1}$ | Sigma Aldrich, Taufkirchen, Germany |
| Anti-CD26-FITC          | mouse  | human       | 1:5                                      | BD Biosciences, San Jose, USA       |
| Anti-CD33-PE            | mouse  | human       | 1:5                                      | BD Biosciences                      |
| Anti-CD34-FITC          | mouse  | human       | 1:5                                      | BD Biosciences                      |
| Anti-CD38-APC           | mouse  | human       | 1:5                                      | BD Biosciences                      |
| Mouse IgG2a control PE  | mouse  | unspecific  | 1:5                                      | ImmunoTools                         |
| Mouse IgG1 control FITC | mouse  | unspecific  | 1:5                                      | ImmunoTools                         |

**Table S6.** Sequences of PCR primers

| Gene              | Primer     | Sequence in 5' → 3' direction                       | Annealing temperature |
|-------------------|------------|-----------------------------------------------------|-----------------------|
| SLCO1B1 (OATP1B1) | fwd<br>rev | TGAACACCGTTGGAATTGC<br>TCTCTATGAGATGTCCTGGAT        | 60.2°C                |
| SLCO1B3 (OATP1B3) | fwd<br>rev | GTCCAGTCATTGGCTTTGCA<br>CAACCCAACGAGAGTCCTTAGG      | 63.1°C                |
| SLC22A1 (OCT1)    | fwd<br>rev | GTGTGTAGACCCCCTGGCTA<br>GTGTAGCCAGCCATCCAGTT        | 63.1°C                |
| SLC10A2 (NTCP)    | fwd<br>rev | GGGACATGAACCTCAGCATT<br>CGTTTGGATTTGAGGACGAT        | 62.0°C                |
| MDR1 (ABCB1)      | fwd<br>rev | TCTGGAGGAAGACATGACCAGGTA<br>GGCACAAAATGAAACCTGAATGT | 61.0°C                |
| β-GUS             | fwd<br>rev | AGAAACGATTGCAGGGTTTCAC<br>CCGAGTGAAGATCCCCTTTTTA    | 62.0°C                |

**Table S7.** SiRNA for knockdown attempts

| siRNA                                     | Interrogated Sequence | Amount (per 100 µL cell suspension) | ID      | Company                               |
|-------------------------------------------|-----------------------|-------------------------------------|---------|---------------------------------------|
| SLCO1B3 (OATP1B3) siRNA                   | NM_019844.3           | 30 pmol                             | s26262  | Ambion, Thermo Fisher Scientific, USA |
| SLC22A1 (OCT1) siRNA                      | NM_003057.2           | 30 pmol                             | 117134  | Ambion, Thermo Fisher Scientific      |
| All Stars negativ control scrambles siRNA |                       | 30 pmol                             | 1027280 | Qiagen N.V.                           |
